# Supplementary material for: Expression of ezrin in subventricular zone neural stem cells and their progeny in adult and developing mice
Source: Springer Nature journal article supplement (doi:10.1007/s00418-012-1048-7), 2012-11-14
Supplement: MOESM1 [file 418_2012_1048_MOESM1_ESM.doc]

**Supplementary Figure Information**

To further confirm the expression of ezrin in the DCX-expressing neuroblasts, we examined the cell population by flow cytometry. After dissecting the tissue including the subventricular zone and rostral migratory stream of adult mice, the tissue was dissociated into small pieces. The dissociated tissues were incubated with trypsin-EDTA 0.25% at 37 °C for 10 min and passed through a 40 m mesh cell strainer. Isolated cells were fixed with BD Cytofix/perm solution (BD Biosciences, San Jose, CA, USA). After washing with BD Perm/Wash buffer, cells were re-suspended in BD Perm/Wash buffer and immunostained with goat anti-DCX (1:300, Santa Cruz Biotechnology, Santa Cruz, CA, USA), and mouse anti-Ezr (1:100, Abcam, Cambridge, UK) for 20 min at room temperature. After washing twice, the cells were incubated with Cy3-conjugated anti-goat IgG, and Alexa Fluor 488-conjugated anti-mouse IgG secondary antibodies (1:500, Jackson ImmunoResearch Laboratories, West Grove, PA, USA) for 30 min. Cells were then analyzed by using the BD FACS Canto II and CellQuest software. Omission of both primary antibodies (CON, A) was used for gate setting, and the only anti-ezrin (B), anti-DCX (C) or both antibodies (D) were included. Approximately 2.4% of total cells were double-labeled by two antibodies, and 85.7% of DCX-expressing cells also expressed ezrin.
